# Supplementary material
Source: publisher figshare collection journal article supplement (https://karger.figshare.com/ndownloader/files/26674808)
Supplement: Supplementary file 1 [file 26674808]

**Suppl. table 1.** Demographic parameters of patients with combined pulmonary fibrosis and emphysema at different sites

|  | All | Hemer (n = 24) | Greifswald (n = 17 | p value (Hemer vs. Greifswald) |
| --- | --- | --- | --- | --- |
| Gender (male/female) | 36/5 | 20/4 | 16/1 |  |
| Age (years) | 69.4 ± 9.2 | 67.4 ± 9.5 | 72.3 ± 8.1 | 0.09 |
| Weight (kg) | 80.3 ± 13.7 | 79.0 ± 14.3 | 82.2 ± 12.9 | 0.46 |
| Height (cm) | 172.3 ± 8.0 | 171.6 ± 8.1 | 173.2 ± 8.0 | 0.53 |
| BMI (kg/m²) | 27.0 ± 4.1 | 26.8 ± 4.6 | 27.3 ± 3.3 | 0.7 |
| CPFE + PH/CPFE | 19/22 | 6/18 | 13/4 |  |
